# Supplementary material for: The characterization of long-range transported North American biomass burning plumes: what can a multi-wavelength Mie-Raman-polarization-fluorescence lidar provide?
Source: Copernicus journal article supplement (doi:10.5194/acp-2021-971), 2021-11-25
Supplement: Supplementary file 1 [file acp-2021-971-supplement.pdf]

# Supplementary information

To article:

**The characterization of long-range transported California biomass burning plumes: what can a multi-wavelength Mie-Raman-polarization-fluorescence lidar provide?**

By Qiaoyun Hu et.al.

- Figure S1. UVAI (UV aerosol index) measured by OMPS instruments.
- Figure S2: Observations of CALIPSO on 07 September 2020.
- Figure S3: Observations of CALIPSO on 10 September 2020.

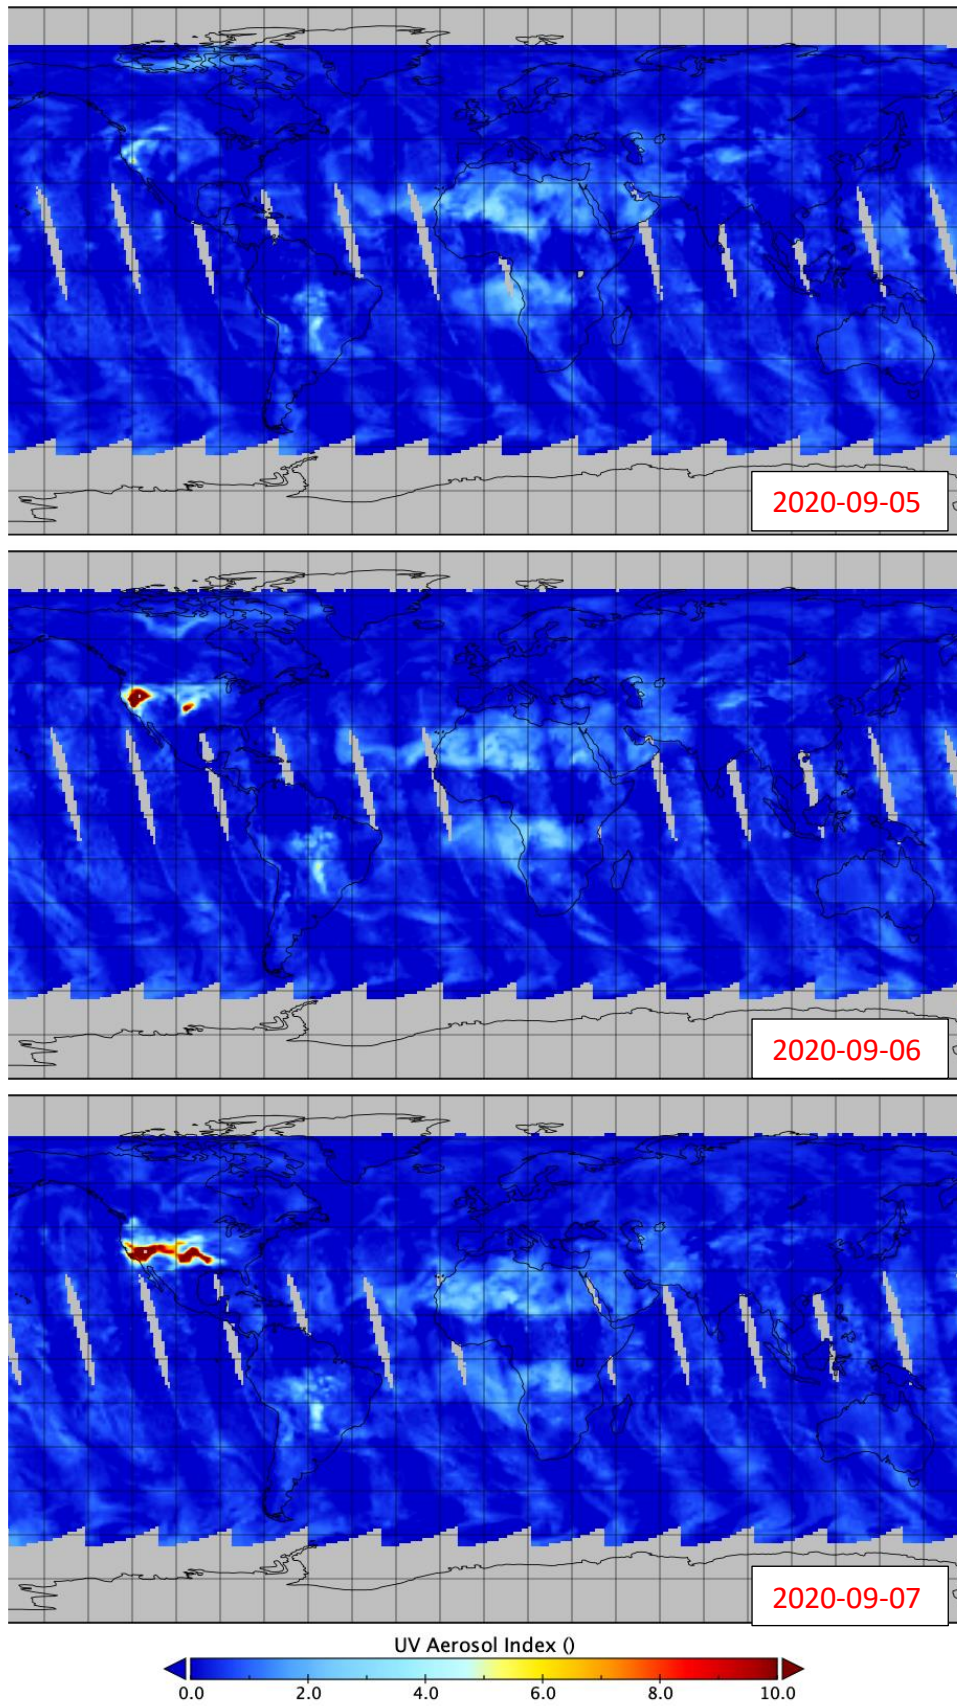

Figure S1: UVAI (UV aerosol index) measured by OMPS instruments.

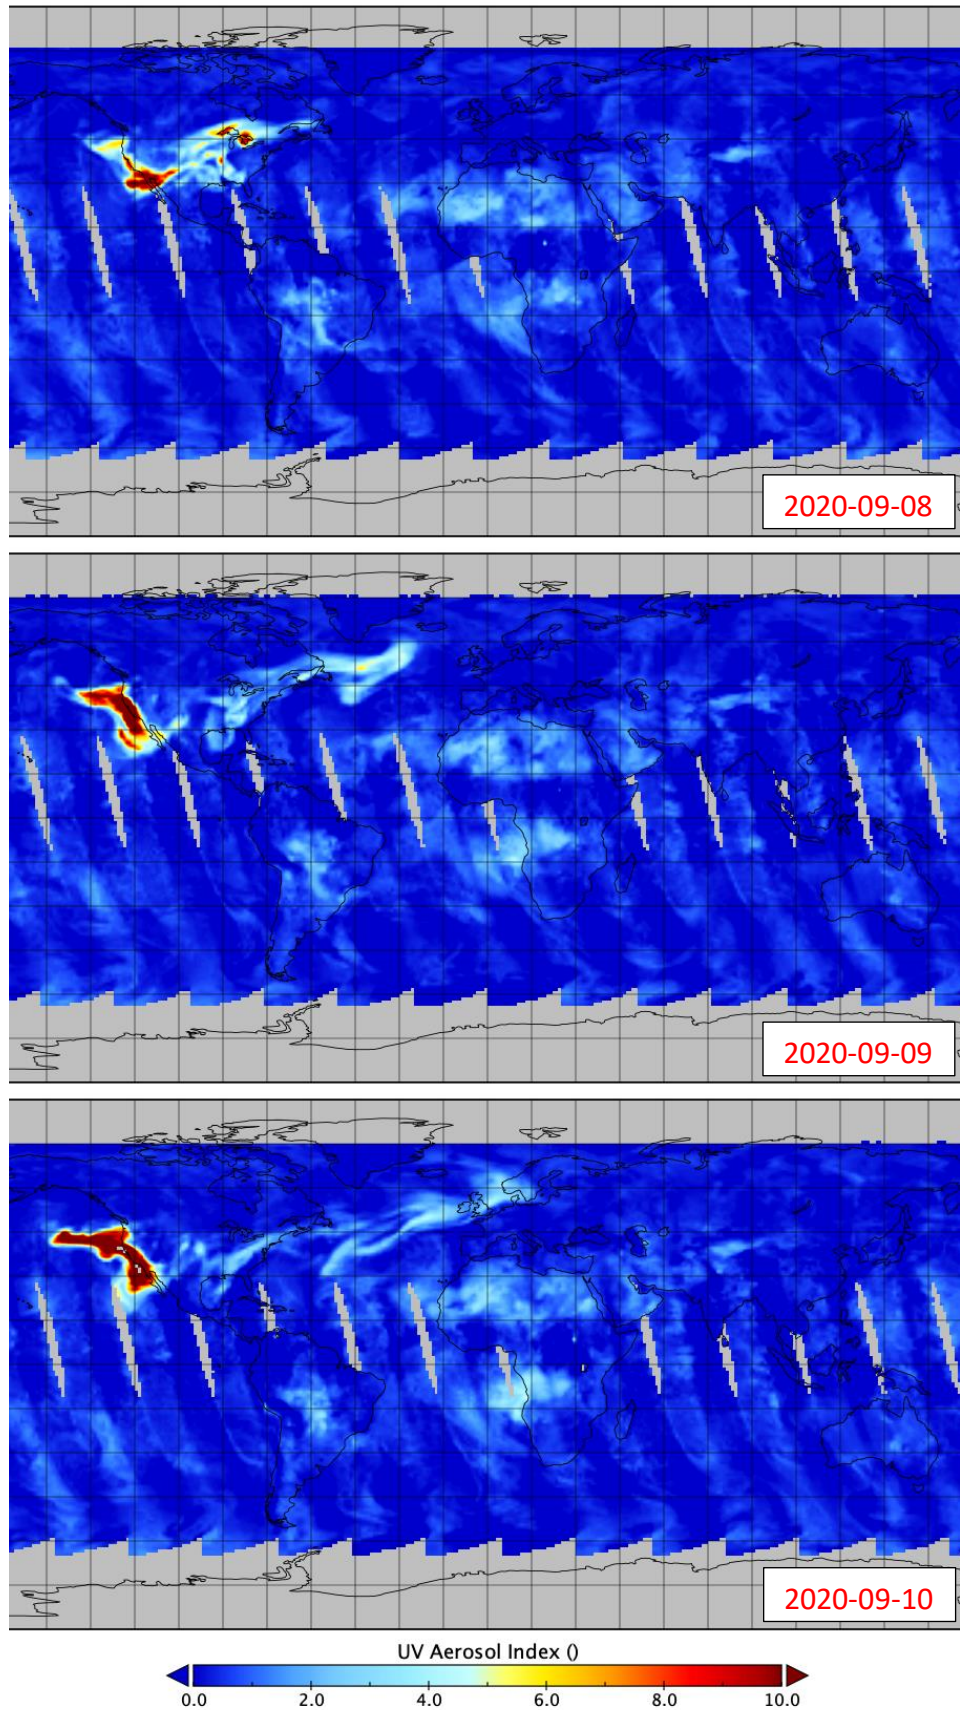

Figure S1: (Continued) UVAI (UV aerosol index) measured by OMPS instruments.



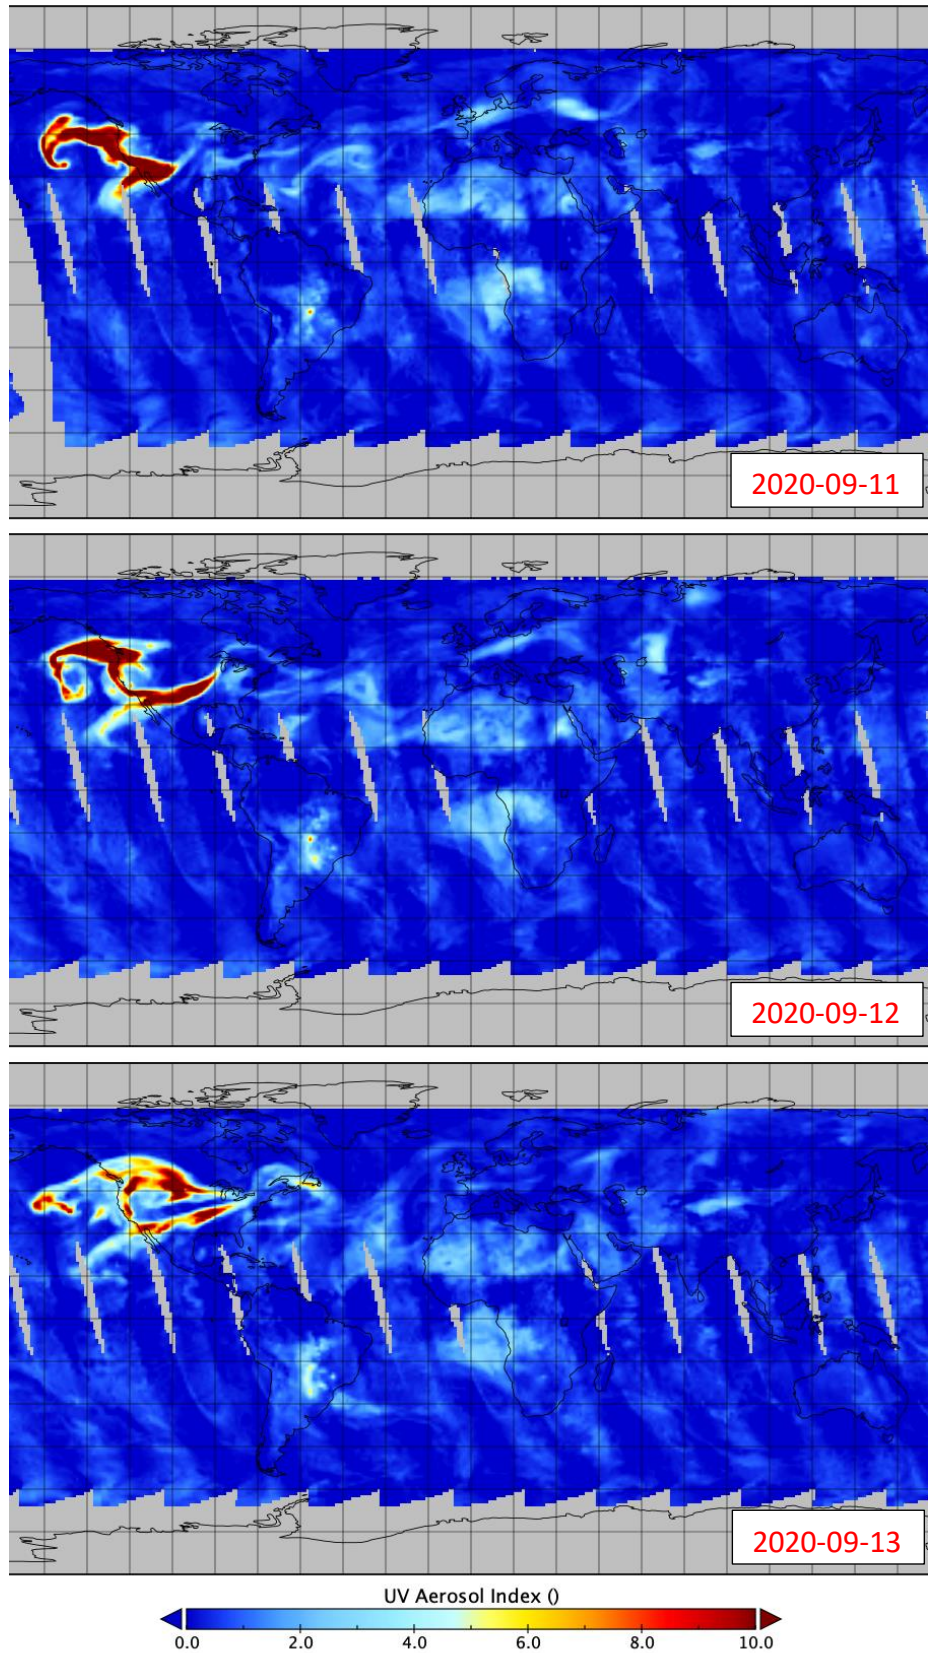

Figure S1: (Continued) UVAI (UV aerosol index) measured by OMPS instruments.

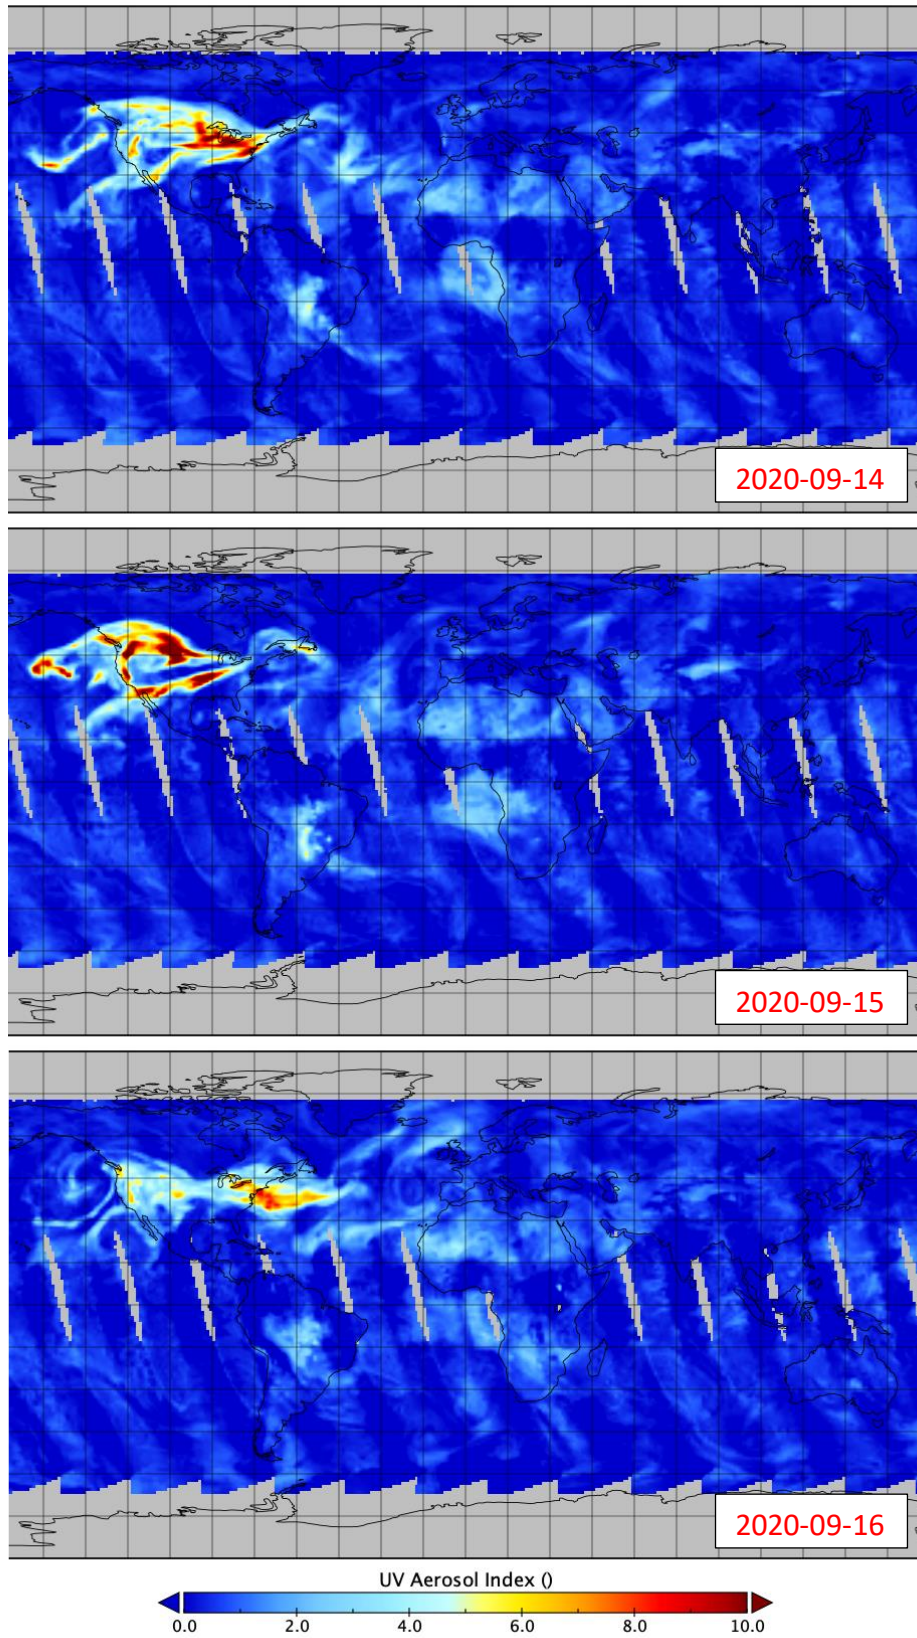

Figure S1: (Continued) UVAI (UV aerosol index) measured by OMPS instruments.



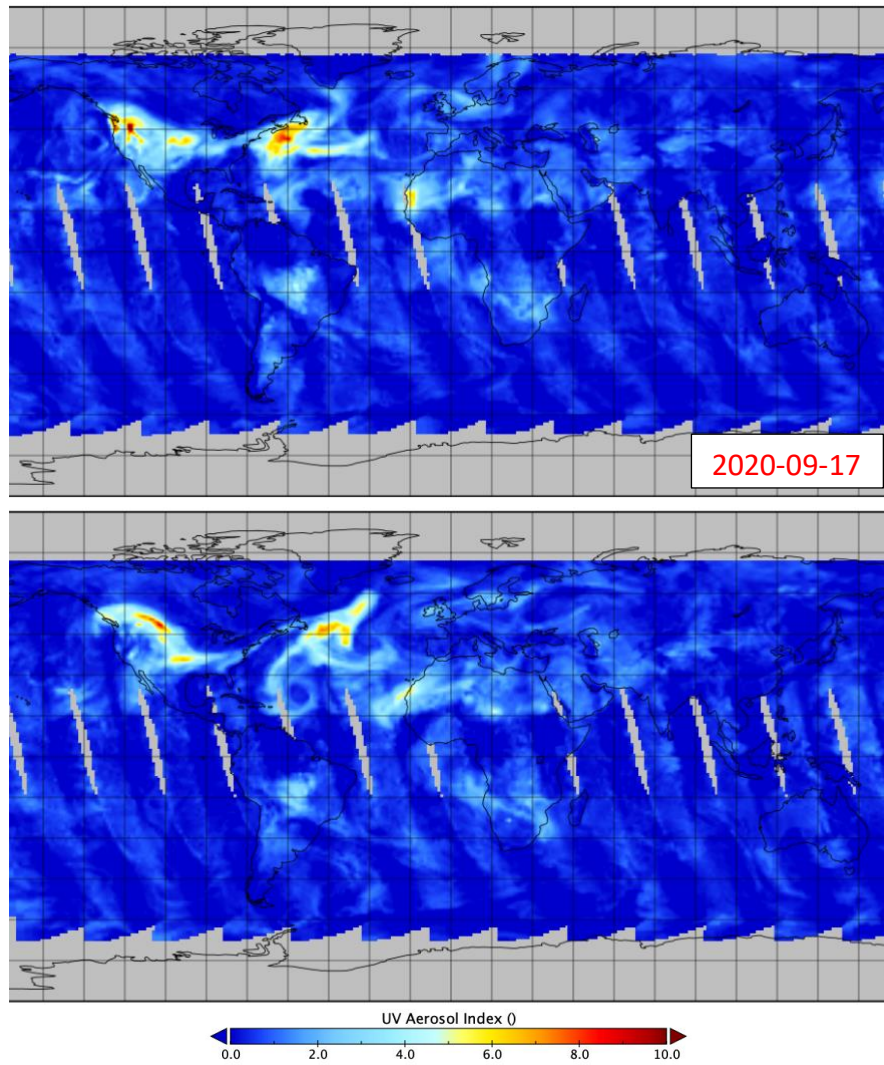

Figure S1: (Continued) UVAI (UV aerosol index) measured by OMPS instruments.

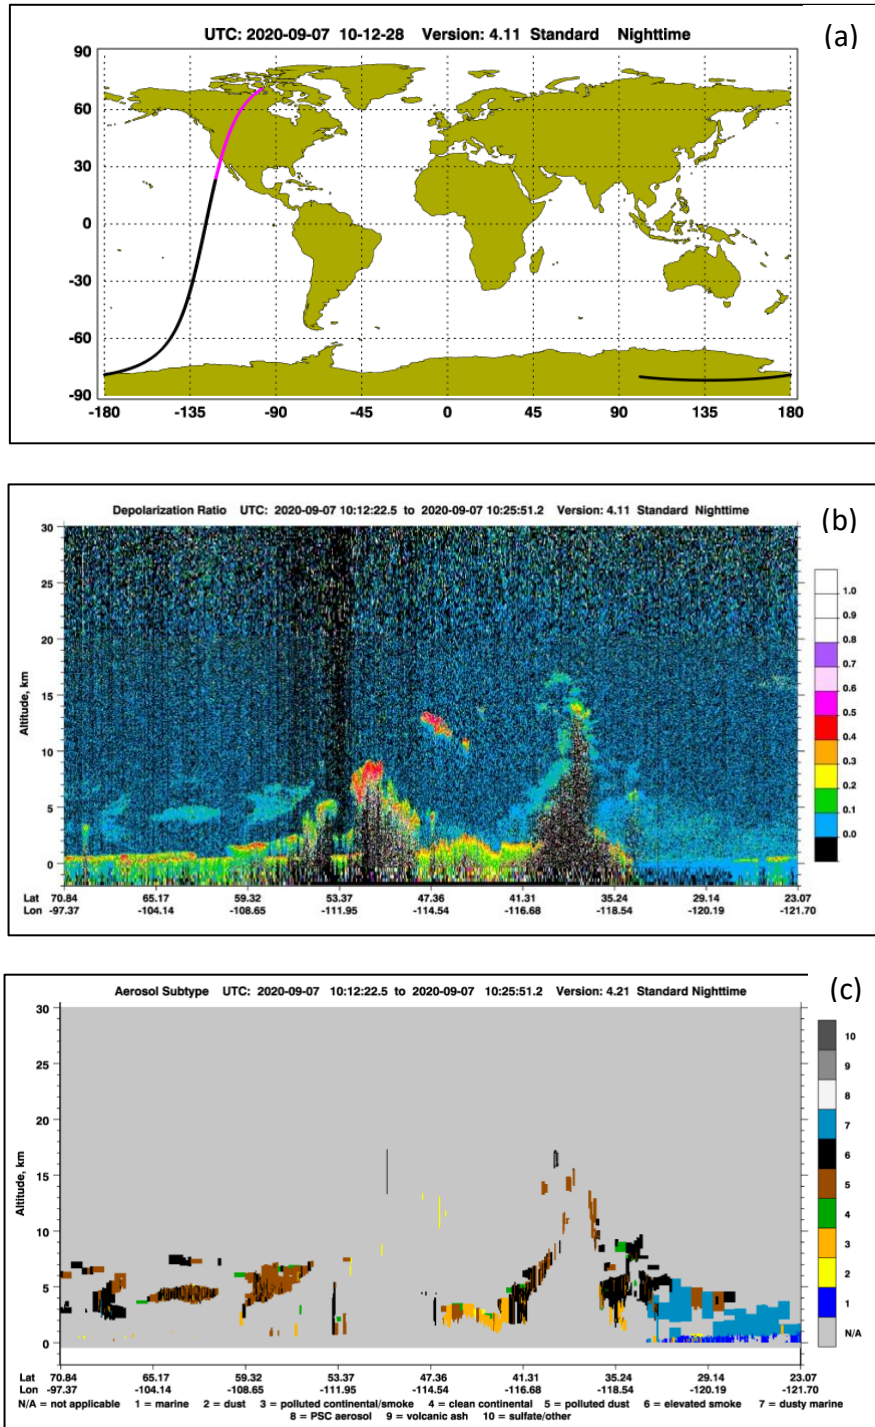

Figure S2: Observations of CALIPSO on 07 September 2020. (a) CALIPSO orbit track, (b) depolarization ratio at 532 nm, (c) aerosol subtype on 2020-09-07. A towering like pyro-cumulonimbus cloud with smoke from Creek fire was detected between (41.31N, 116.68W) and (35.24N, 118.54W)

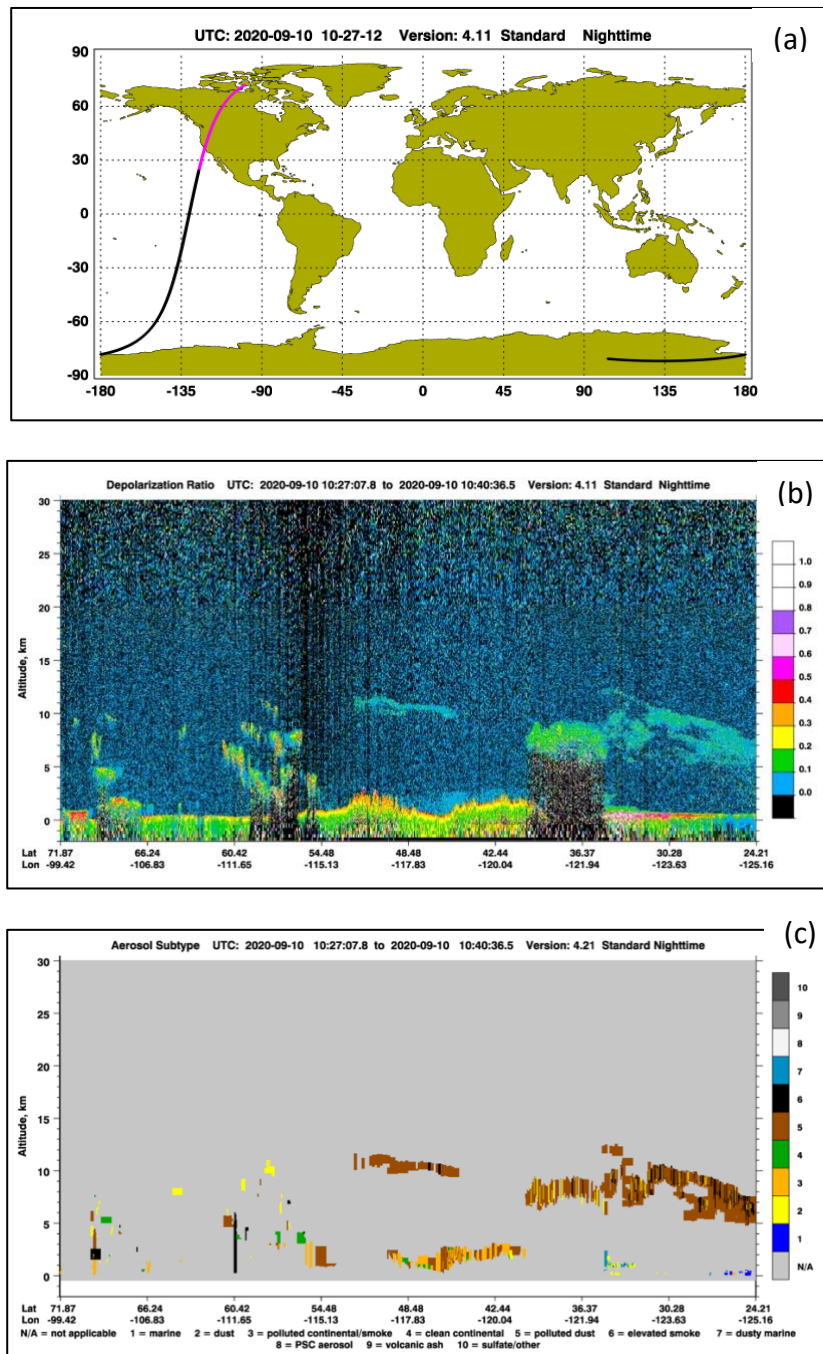

Figure S3: Observations of CALIPSO on 10 September 2020. (a) CALIPSO orbit track, (b) depolarization ratio at 532 nm, (c) aerosol subtype on 2020-09-10.
